# Supplementary material for: Unusual Genomic Traits Suggest Methylocystis bryophila S285 to Be Well Adapted for Life in Peatlands
Source: PubMed Central journal article supplement — Genome Biol Evol. 2018 Jan 30;10(2):623–8. doi: 10.1093/gbe/evy025 (PMC5808792; doi:10.1093/gbe/evy025), 2018-01-30
Supplement: evy025_supp.pdf [file evy025_supp.pdf]

## Supplementary Material

### Unusual genomic traits suggest *Methylocystis bryophila* S285 to be well adapted for life in peatlands

Dongfei Han<sup>1</sup>, Svetlana N. Dedysh<sup>2</sup>, Werner Liesack<sup>1\*</sup>

<sup>1</sup>Max Planck Institute for Terrestrial Microbiology,

Karl-von-Frisch-Str. 10, D-35043, Marburg, Germany

<sup>2</sup>Winogradsky Institute of Microbiology, Research Center of Biotechnology of the Russian

Academy of Sciences, 33, bld. 2 Leninsky Ave., 119071, Moscow, Russia

Running title: Complete genome of *Methylocystis bryophila* S285

Keywords: methanotrophs, *Methylocystis*, finished genome, comparative genomics,  
methane monooxygenase, nitrogenase

\*Corresponding author

Tel: +49 (6421) 178 620; Fax: +49 (6421) 178 999;

E-mail: [liesack@mpi-marburg.mpg.de](mailto:liesack@mpi-marburg.mpg.de)

**Table S1. SEED subsystem feature counts for *Methylocystis bryophila* S285, *Methylocystis* sp. SC2 and *Methylocella silvestris* BL2.**

| <b>Subsystem Feature Counts<sup>1</sup></b>        | <b>S285</b> | <b>SC2</b> | <b>BL2</b> |
|----------------------------------------------------|-------------|------------|------------|
| Amino Acids and Derivatives                        | 306         | 282        | 299        |
| Carbohydrates                                      | 292         | 265        | 333        |
| Cell Division and Cell Cycle                       | 26          | 27         | 25         |
| Cell Wall and Capsule                              | 113         | 113        | 85         |
| Cofactors, Vitamins, Prosthetic Groups, Pigments   | 274         | 215        | 291        |
| DNA Metabolism                                     | 97          | 84         | 120        |
| Dormancy and Sporulation                           | 1           | 1          | 1          |
| Fatty Acids, Lipids, and Isoprenoids               | 127         | 105        | 136        |
| Iron acquisition and Metabolism                    | 5           | 5          | 34         |
| Membrane Transport                                 | 104         | 88         | 118        |
| Metabolism of Aromatic Compounds                   | 14          | 20         | 17         |
| Miscellaneous                                      | 60          | 61         | 54         |
| Motility and Chemotaxis                            | 0           | 0          | 75         |
| Nitrogen Metabolism                                | 67          | 52         | 81         |
| Nucleosides and Nucleotides                        | 75          | 74         | 79         |
| Phages, Prophages, Transposable elements, Plasmids | 1           | 20         | 2          |
| Phosphorus Metabolism                              | 41          | 43         | 49         |
| Photosynthesis                                     | 0           | 0          | 11         |
| Potassium Metabolism                               | 9           | 8          | 12         |
| Protein Metabolism                                 | 265         | 253        | 277        |
| Regulation and Cell Signaling                      | 84          | 64         | 84         |
| Respiration                                        | 171         | 172        | 172        |
| RNA Metabolism                                     | 138         | 135        | 148        |
| Secondary Metabolism                               | 9           | 12         | 4          |
| Stress Response                                    | 127         | 104        | 121        |
| Sulfur Metabolism                                  | 51          | 39         | 58         |
| Virulence, Disease and Defense                     | 137         | 88         | 104        |
| Total number of genes                              | 2594        | 2330       | 2790       |

<sup>1</sup> Analysis was done on SEED subsystem level 1.

**Table S2. Average nucleotide identity (ANI) calculation based on BLAST+**

| ANI values and<br>- in parenthesis -<br>aligned percentage <sup>1</sup> | Alphaproteobacteria                                  |                               |                           |                            |                               |                                       |                                  |                                                    | Gammaproteobacteria                     |                                        |                             |                                         |                                         | Verrucomicrobia                          |                            |
|-------------------------------------------------------------------------|------------------------------------------------------|-------------------------------|---------------------------|----------------------------|-------------------------------|---------------------------------------|----------------------------------|----------------------------------------------------|-----------------------------------------|----------------------------------------|-----------------------------|-----------------------------------------|-----------------------------------------|------------------------------------------|----------------------------|
|                                                                         | <i>Mec.</i> <sup>2</sup><br><i>bryophila</i><br>S285 | <i>Mec. sp.</i><br>strain SC2 | <i>Mec. rosea</i><br>SV97 | <i>Mec. parvus</i><br>OBBP | <i>Mec. sp.</i><br>strain SB2 | <i>Mec. sp.</i><br>strain<br>Rockwell | <i>Mec. sp.</i><br>strain<br>LW5 | <i>Ms.</i><br><i>trichosporiu</i><br><i>m</i> OB3b | <i>Mce.</i><br><i>silvestris</i><br>BL2 | <i>Mca.</i><br><i>acidiphila</i><br>B2 | <i>Mfe. stellata</i><br>AR4 | <i>Mc.</i><br><i>capsulatus</i><br>Bath | <i>Mmo.</i><br><i>methanica</i><br>MC09 | <i>Mm.</i><br><i>alcaliphilum</i><br>20Z | <i>Ma. inferorum</i><br>V4 |
| <i>Mec. bryophila</i> S285                                              | *                                                    | 72.88 [32.40]                 | 72.97 [31.29]             | 73.13 [33.31]              | 72.92 [31.14]                 | 73.46 [32.00]                         | 73.19 [33.63]                    | 73.36 [33.60]                                      | 70.05 [23.02]                           | 69.95 [25.43]                          | 69.37 [22.89]               | 65.24 [8.10]                            | 63.70 [5.58]                            | 64.06 [4.33]                             | 63.21 [1.64]               |
| <i>Mec. sp.</i> strain SC2                                              | 73.28 [37.25]                                        | *                             | 91.24 [70.96]             | 76.56 [47.67]              | 91.19 [70.19]                 | 77.57 [48.39]                         | 74.30 [38.50]                    | 74.70 [38.70]                                      | 71.02 [25.40]                           | 70.68 [27.45]                          | 70.58 [24.54]               | 65.30 [9.35]                            | 63.77 [6.58]                            | 63.59 [5.97]                             | 62.89 [1.63]               |
| <i>Mec. rosea</i> SV97                                                  | 73.21 [35.61]                                        | 90.96 [70.13]                 | *                         | 76.30 [46.47]              | 95.24 [78.04]                 | 77.32 [48.62]                         | 73.99 [37.94]                    | 74.43 [37.09]                                      | 70.74 [26.48]                           | 70.66 [26.58]                          | 70.24 [24.22]               | 65.19 [9.22]                            | 63.61 [6.52]                            | 63.51 [5.83]                             | 62.70 [1.58]               |
| <i>Mec. parvus</i> OBBP                                                 | 73.15 [33.44]                                        | 76.40 [40.96]                 | 76.17 [39.96]             | *                          | 76.23 [38.95]                 | 78.76 [48.16]                         | 74.31 [36.10]                    | 74.27 [36.05]                                      | 70.75 [23.88]                           | 70.54 [24.85]                          | 69.94 [22.69]               | 65.51 [8.23]                            | 64.22 [5.66]                            | 63.68 [4.88]                             | 62.79 [1.22]               |
| <i>Mec. sp.</i> strain SB2                                              | 73.26 [38.63]                                        | 91.01 [76.69]                 | 95.63 [85.63]             | 76.41 [49.45]              | *                             | 77.43 [51.02]                         | 74.14 [41.70]                    | 74.50 [40.38]                                      | 70.91 [28.23]                           | 70.59 [28.33]                          | 70.41 [26.50]               | 64.95 [9.67]                            | 63.94 [6.36]                            | 64.04 [5.95]                             | 63.12 [1.54]               |
| <i>Mec. sp.</i> strain Rockwell                                         | 73.53 [30.35]                                        | 77.10 [39.99]                 | 77.17 [40.99]             | 78.91 [46.98]              | 77.16 [38.00]                 | *                                     | 74.76 [33.69]                    | 74.92 [34.00]                                      | 70.96 [21.54]                           | 70.78 [24.10]                          | 70.41 [20.38]               | 65.22 [7.84]                            | 63.79 [5.38]                            | 63.49 [4.91]                             | 62.56 [1.41]               |
| <i>Mec. sp.</i> strain LW5                                              | 73.71 [30.78]                                        | 74.14 [31.40]                 | 74.01 [31.18]             | 74.60 [34.18]              | 74.01 [30.73]                 | 75.00 [33.78]                         | *                                | 80.17 [49.28]                                      | 71.19 [24.48]                           | 71.20 [25.16]                          | 70.57 [24.22]               | 65.75 [8.22]                            | 64.63 [5.79]                            | 64.28 [4.91]                             | 63.54 [1.44]               |
| <i>Ms. trichosporium</i> OB3b                                           | 74.08 [29.18]                                        | 74.85 [28.90]                 | 74.76 [27.84]             | 74.69 [31.30]              | 74.75 [27.29]                 | 75.38 [31.33]                         | 80.45 [45.41]                    | *                                                  | 71.55 [22.15]                           | 71.57 [24.18]                          | 70.90 [20.95]               | 65.87 [7.76]                            | 64.15 [5.78]                            | 64.14 [4.38]                             | 63.16 [1.14]               |
| <i>Mce. silvestris</i> BL2                                              | 69.97 [23.55]                                        | 70.67 [23.33]                 | 70.41 [23.99]             | 70.82 [24.81]              | 70.45 [23.60]                 | 70.68 [24.25]                         | 70.69 [27.06]                    | 71.05 [26.32]                                      | *                                       | 73.77 [35.38]                          | 71.89 [32.08]               | 64.97 [8.54]                            | 63.77 [5.99]                            | 63.71 [5.20]                             | 62.65 [1.49]               |
| <i>Mca. acidiphila</i> B2                                               | 70.13 [27.89]                                        | 70.47 [26.30]                 | 70.27 [26.11]             | 70.51 [27.13]              | 70.27 [24.88]                 | 70.47 [27.99]                         | 70.72 [29.50]                    | 71.06 [29.84]                                      | 73.63 [38.26]                           | *                                      | 72.55 [33.56]               | 65.20 [8.42]                            | 63.40 [6.04]                            | 63.24 [5.28]                             | 62.66 [1.69]               |
| <i>Mfe. stellata</i> AR4                                                | 69.16 [25.02]                                        | 69.88 [23.61]                 | 69.99 [23.18]             | 69.71 [25.06]              | 70.03 [23.06]                 | 69.93 [24.69]                         | 70.07 [28.34]                    | 70.12 [27.40]                                      | 71.72 [34.20]                           | 72.37 [33.48]                          | *                           | 64.81 [8.33]                            | 63.27 [5.96]                            | 63.24 [5.50]                             | 62.79 [1.65]               |
| <i>Mc. capsulatus</i> Bath                                              | 64.92 [11.85]                                        | 65.00 [11.63]                 | 64.97 [11.24]             | 65.11 [12.15]              | 64.88 [11.04]                 | 65.27 [11.89]                         | 65.37 [11.83]                    | 65.28 [12.80]                                      | 65.17 [11.33]                           | 65.25 [10.79]                          | 64.76 [10.58]               | *                                       | 66.61 [26.19]                           | 66.13 [23.34]                            | 62.87 [2.77]               |
| <i>Mmo. methanica</i> MC09                                              | 64.03 [5.09]                                         | 63.93 [5.47]                  | 63.66 [5.41]              | 64.01 [5.54]               | 64.13 [5.08]                  | 63.85 [5.57]                          | 64.25 [5.54]                     | 64.52 [5.62]                                       | 63.88 [5.29]                            | 63.76 [5.13]                           | 63.65 [5.17]                | 66.72 [17.75]                           | *                                       | 69.11 [28.92]                            | 62.96 [1.57]               |
| <i>Mm. alcaliphilum</i> 20Z                                             | 63.66 [4.60]                                         | 63.84 [4.75]                  | 63.84 [4.85]              | 63.96 [4.72]               | 64.08 [4.72]                  | 63.64 [4.85]                          | 64.02 [4.90]                     | 63.95 [4.67]                                       | 63.58 [4.88]                            | 63.54 [4.62]                           | 63.48 [4.90]                | 65.97 [17.45]                           | 69.12 [31.35]                           | *                                        | 62.28 [1.78]               |
| <i>Ma. inferorum</i> V4                                                 | 62.80 [2.69]                                         | 63.00 [2.52]                  | 62.66 [2.55]              | 62.94 [2.52]               | 63.02 [2.35]                  | 62.56 [2.73]                          | 63.19 [2.22]                     | 62.82 [2.41]                                       | 62.76 [2.66]                            | 62.59 [2.56]                           | 63.27 [2.71]                | 62.47 [3.44]                            | 62.18 [2.87]                            | 61.56 [2.93]                             | *                          |

<sup>1</sup>Percentage values relate to the genomic regions that could be aligned.

<sup>2</sup>*Mec.* = *Methylocystis*, *Ms.* = *Methylosinus*, *Mce.* = *Methylocella*, *Mca.* = *Methylocapsa*, *Mfe.* = *Methyloferula*, *Mc.* = *Methylococcus*, *Mmo.* = *Methylomonas*, *Mm.* = *Methylomicrobium*, *Ma.* = *Methylacidiphilum*

**Table S3. Comparison of gene traits between *Methylocystis* spp.**

| Number of common traits              |                                 | II                                             |                            |                        |                         |                            |                                 |                            |                            |
|--------------------------------------|---------------------------------|------------------------------------------------|----------------------------|------------------------|-------------------------|----------------------------|---------------------------------|----------------------------|----------------------------|
|                                      |                                 | <i>Mec.</i> <sup>1</sup> <i>bryophila</i> S285 | <i>Mec. sp.</i> strain SC2 | <i>Mec. rosea</i> SV97 | <i>Mec. parvus</i> OBBP | <i>Mec. sp.</i> strain SB2 | <i>Mec. sp.</i> strain Rockwell | <i>Mec. sp.</i> strain LW5 | <i>Mce. silvestris</i> BL2 |
| I                                    | <i>Mec. bryophila</i> S285      | –                                              | –                          | –                      | –                       | –                          | –                               | –                          | –                          |
|                                      | <i>Mec. sp.</i> strain SC2      | 1959 (2222, 88.2%)                             | –                          | –                      | –                       | –                          | –                               | –                          | –                          |
|                                      | <i>Mec. rosea</i> SV97          | 1969 (2291, 85.9%)                             | 2083 (2211, 94.2%)         | –                      | –                       | –                          | –                               | –                          | –                          |
|                                      | <i>Mec. parvus</i> OBBP         | 1918 (2280, 84.1%)                             | 1994 (2243, 88.9%)         | 1985 (2283, 86.9%)     | –                       | –                          | –                               | –                          | –                          |
|                                      | <i>Mec. sp.</i> strain SB2      | 1918 (2218, 86.5%)                             | 2025 (2145, 94.4%)         | 2092 (2146, 97.5%)     | 1936 (2226, 87.0%)      | –                          | –                               | –                          | –                          |
|                                      | <i>Mec. sp.</i> strain Rockwell | 1924 (2295, 83.8%)                             | 1970 (2228, 88.4%)         | 1979 (2275, 87.0%)     | 2074 (2278, 91.0%)      | 1939 (2221, 87.3%)         | –                               | –                          | –                          |
|                                      | <i>Mec. sp.</i> strain LW5      | 1949 (2357, 82.7%)                             | 1959 (2320, 84.4%)         | 1985 (2365, 83.9%)     | 1918 (2280, 84.1%)      | 1919 (2292, 83.7%)         | 2029 (2368, 85.7%)              | –                          | –                          |
|                                      | <i>Mce. silvestris</i> BL2      | 1858 (2471, 75.2%)                             | 1820 (2464, 73.9%)         | 1874 (2495, 75.1%)     | 1911 (2518, 75.9%)      | 1817 (2416, 75.2%)         | 1890 (2516, 75.1%)              | 1999 (2577, 77.6%)         | –                          |
| Number of unique traits <sup>2</sup> |                                 | II                                             |                            |                        |                         |                            |                                 |                            |                            |
|                                      |                                 | <i>Mec. bryophila</i> S285                     | <i>Mec. sp.</i> strain SC2 | <i>Mec. rosea</i> SV97 | <i>Mec. parvus</i> OBBP | <i>Mec. sp.</i> strain SB2 | <i>Mec. sp.</i> strain Rockwell | <i>Mec. sp.</i> strain LW5 | <i>Mce. silvestris</i> BL2 |
| I                                    | <i>Mec. bryophila</i> S285      | –                                              | 148 (2222, 6.7%)           | 169 (2291, 7.4%)       | 160 (2280, 7.0%)        | 172 (2218, 7.8%)           | 184 (2295, 8.0%)                | 174 (2357, 7.4%)           | 224 (2471, 9.2%)           |
|                                      | <i>Mec. sp.</i> strain SC2      | 115 (2222, 5.2%)                               | –                          | 55 (2211, 2.5%)        | 90 (2243, 4.0%)         | 64 (2145, 3.0%)            | 110 (2228, 4.9%)                | 130 (2320, 5.6%)           | 222 (2464, 9.0%)           |
|                                      | <i>Mec. rosea</i> SV97          | 153 (2291, 6.7%)                               | 73 (2211, 3.3%)            | –                      | 122 (2283, 5.3%)        | 40 (2146, 1.9%)            | 140 (2275, 6.2%)                | 148 (2365, 6.3%)           | 216 (2495, 8.7%)           |
|                                      | <i>Mec. parvus</i> OBBP         | 195 (2280, 8.6%)                               | 159 (2243, 7.1%)           | 176 (2283, 7.7%)       | –                       | 185 (2226, 8.3%)           | 118 (2278, 5.2%)                | 160 (2280, 7.0%)           | 239 (2518, 9.5%)           |
|                                      | <i>Mec. sp.</i> strain SB2      | 128 (2218, 5.8%)                               | 56 (2145, 2.6%)            | 14 (2146, 0.7%)        | 105 (2226, 4.7%)        | –                          | 118 (2221, 5.3%)                | 132 (2292, 5.8%)           | 190 (2416, 7.9%)           |
|                                      | <i>Mec. sp.</i> strain Rockwell | 187 (2295, 8.1%)                               | 148 (2228, 6.6%)           | 156 (2275, 6.9%)       | 86 (2278, 3.8%)         | 164 (2221, 7.4%)           | –                               | 139 (2368, 5.9%)           | 232 (2516, 9.2%)           |
|                                      | <i>Mec. sp.</i> strain LW5      | 234 (2357, 9.9%)                               | 231 (2320, 10.0%)          | 232 (2365, 9.8%)       | 189 (2280, 8.3%)        | 241 (2292, 10.5%)          | 200 (2368, 8.4%)                | –                          | 237 (2577, 9.2%)           |
|                                      | <i>Mce. silvestris</i> BL2      | 389 (2471, 15.7%)                              | 422 (2464, 17.1%)          | 405 (2495, 16.2%)      | 368 (2518, 14.6%)       | 409 (2416, 16.9%)          | 394 (2516, 15.7%)               | 341 (2577, 13.2%)          | –                          |

<sup>1</sup>*Mec.* = *Methylocystis*, *Mce.* = *Methylocella*.

<sup>2</sup>The reciprocal numbers (= unique gene traits) in up- and down-triangle were calculated by two-way comparison.

**Table S4. Unusual genomic features of *Methylocystis bryophila* S285. Detection of particular gene traits is based on RAST/SEED annotation complemented with manual survey for the presence of particulate methane monooxygenases (pMMO1, pMMO2).**

| Gene loci in the genome of strain S285                              | Features <sup>1</sup>                                        | Alphaproteobacteria                                  |                                  |                           |                            |                                  |                                       |                                  |                                              |                                         | Gammaproteobacteria                    |                                       |                                         |                                         | Verrucomicrobia                          |                             |
|---------------------------------------------------------------------|--------------------------------------------------------------|------------------------------------------------------|----------------------------------|---------------------------|----------------------------|----------------------------------|---------------------------------------|----------------------------------|----------------------------------------------|-----------------------------------------|----------------------------------------|---------------------------------------|-----------------------------------------|-----------------------------------------|------------------------------------------|-----------------------------|
|                                                                     |                                                              | <i>Mec.</i> <sup>2</sup><br><i>bryophila</i><br>S285 | <i>Mec. sp.</i><br>strain<br>SC2 | <i>Mec. rosea</i><br>SV97 | <i>Mec. parvus</i><br>OBBP | <i>Mec. sp.</i><br>strain<br>SB2 | <i>Mec. sp.</i><br>strain<br>Rockwell | <i>Mec. sp.</i><br>strain<br>LW5 | <i>Ms. tricho-</i><br><i>sporium</i><br>OB3b | <i>Mce.</i><br><i>silvestris</i><br>BL2 | <i>Mca.</i><br><i>acidiphila</i><br>B2 | <i>Mfe.</i><br><i>stellata</i><br>AR4 | <i>Mc.</i><br><i>capsulatus</i><br>Bath | <i>Mmo.</i><br><i>methanica</i><br>MC09 | <i>Mm.</i><br><i>alcaliphilum</i><br>20Z | <i>Ma. infernorum</i><br>V4 |
| <b>Particulate methane monooxygenase (pMMO) and related enzymes</b> |                                                              |                                                      |                                  |                           |                            |                                  |                                       |                                  |                                              |                                         |                                        |                                       |                                         |                                         |                                          |                             |
| B1812_14770                                                         | Particulate methane monooxygenase PmoC1                      | Yes                                                  | Yes                              | Yes                       | Yes                        | Yes                              | Yes                                   | Yes                              | Yes                                          | No                                      | Yes                                    | No                                    | Yes                                     | Yes                                     | Yes                                      | Yes                         |
| B1812_18675                                                         | Particulate methane monooxygenase PmoA1                      | Yes                                                  | Yes                              | Yes                       | Yes                        | Yes                              | Yes                                   | Yes                              | Yes                                          | No                                      | Yes                                    | No                                    | Yes                                     | Yes                                     | Yes                                      | Yes                         |
| B1812_14780                                                         | Particulate methane monooxygenase PmoB1                      | Yes                                                  | Yes                              | Yes                       | Yes                        | Yes                              | Yes                                   | Yes                              | Yes                                          | No                                      | Yes                                    | No                                    | Yes                                     | Yes                                     | Yes                                      | Yes                         |
| B1812_13455                                                         | Particulate methane monooxygenase PmoC2                      | Yes                                                  | Yes                              | No                        | Yes                        | No                               | No                                    | Yes                              | No                                           | No                                      | No                                     | No                                    | No                                      | No                                      | No                                       | No                          |
| B1812_13465                                                         | Particulate methane monooxygenase PmoA2                      | Yes                                                  | Yes                              | No                        | Yes                        | No                               | No                                    | Yes                              | No                                           | No                                      | No                                     | No                                    | No                                      | No                                      | No                                       | No                          |
| B1812_13470                                                         | Particulate methane monooxygenase PmoB2                      | Yes                                                  | Yes                              | No                        | Yes                        | No                               | No                                    | Yes                              | No                                           | No                                      | No                                     | No                                    | No                                      | No                                      | No                                       | No                          |
| B1215_00565                                                         | Cu-MMO protein family PxmA                                   | Yes                                                  | No                               | Yes                       | No                         | Yes                              | No                                    | No                               | No                                           | No                                      | No                                     | No                                    | No                                      | No                                      | No                                       | No                          |
| B1215_00560                                                         | Cu-MMO protein family PxmB                                   | Yes                                                  | No                               | Yes                       | No                         | Yes                              | No                                    | No                               | No                                           | No                                      | No                                     | No                                    | No                                      | No                                      | No                                       | No                          |
| B1215_00555                                                         | Cu-MMO protein family PxmC                                   | Yes                                                  | No                               | Yes                       | No                         | Yes                              | No                                    | No                               | No                                           | No                                      | No                                     | No                                    | No                                      | No                                      | No                                       | No                          |
| <b>Soluble methane monooxygenase (sMMO)</b>                         |                                                              |                                                      |                                  |                           |                            |                                  |                                       |                                  |                                              |                                         |                                        |                                       |                                         |                                         |                                          |                             |
| B1812_14125                                                         | Soluble methane monooxygenase MmoZ                           | Yes                                                  | No                               | No                        | No                         | No                               | No                                    | Yes                              | Yes                                          | Yes                                     | No                                     | Yes                                   | Yes                                     | Yes                                     | No                                       | No                          |
| B1812_14135                                                         | Soluble methane monooxygenase MmoY                           | Yes                                                  | No                               | No                        | No                         | No                               | No                                    | Yes                              | Yes                                          | Yes                                     | No                                     | Yes                                   | Yes                                     | Yes                                     | No                                       | No                          |
| B1812_14140                                                         | Soluble methane monooxygenase MmoX                           | Yes                                                  | No                               | No                        | No                         | No                               | No                                    | Yes                              | Yes                                          | Yes                                     | No                                     | Yes                                   | Yes                                     | Yes                                     | No                                       | No                          |
| B1812_14130                                                         | Soluble methane monooxygenase MmoB                           | Yes                                                  | No                               | No                        | No                         | No                               | No                                    | Yes                              | Yes                                          | Yes                                     | No                                     | Yes                                   | Yes                                     | Yes                                     | No                                       | No                          |
| B1812_14115                                                         | Soluble methane monooxygenase MmoC                           | Yes                                                  | No                               | No                        | No                         | No                               | No                                    | Yes                              | Yes                                          | Yes                                     | No                                     | Yes                                   | Yes                                     | Yes                                     | No                                       | No                          |
| B1812_14120                                                         | Soluble methane monooxygenase MmoD                           | Yes                                                  | No                               | No                        | No                         | No                               | No                                    | Yes                              | No                                           | No                                      | No                                     | No                                    | Yes                                     | Yes                                     | No                                       | No                          |
| <b>Alternative carbon assimilation pathway</b>                      |                                                              |                                                      |                                  |                           |                            |                                  |                                       |                                  |                                              |                                         |                                        |                                       |                                         |                                         |                                          |                             |
| B1812_15125                                                         | Acetate permease ActP (sodium:solute symporter) <sup>3</sup> | Yes                                                  | Yes                              | Yes                       | No                         | Yes                              | Yes                                   | Yes                              | Yes                                          | (Yes)                                   | (Yes)                                  | (Yes)                                 | (No)                                    | (No)                                    | (No)                                     | (No)                        |
| B1812_18345                                                         | Alcohol dehydrogenase                                        | Yes                                                  | Yes                              | Yes                       | Yes                        | Yes                              | Yes                                   | Yes                              | Yes                                          | Yes                                     | Yes                                    | Yes                                   | Yes                                     | Yes                                     | Yes                                      | Yes                         |
| B1812_21160                                                         | Aldehyde dehydrogenase                                       | Yes                                                  | Yes                              | Yes                       | Yes                        | Yes                              | Yes                                   | Yes                              | Yes                                          | Yes                                     | Yes                                    | Yes                                   | No                                      | Yes                                     | No <sup>4</sup>                          | Yes                         |
| B1812_21445                                                         | Nitrogenase (vanadium group)                                 | Yes                                                  | No                               | No                        | Yes                        | No                               | No                                    | No                               | No                                           | No                                      | No                                     | No                                    | No                                      | No                                      | No                                       | No                          |
| B1812_06645                                                         | Nitrogenase (iron-iron) transcriptional regulator            | Yes                                                  | No                               | No                        | Yes                        | No                               | No                                    | No                               | No                                           | No                                      | No                                     | No                                    | No                                      | No                                      | No                                       | No                          |
| B1812_06630                                                         | Nitrogenase (vanadium-iron) alpha chain                      | Yes                                                  | No                               | No                        | Yes                        | No                               | No                                    | No                               | No                                           | No                                      | No                                     | No                                    | No                                      | No                                      | No                                       | No                          |
| B1812_06640                                                         | Nitrogenase (vanadium-iron) beta chain                       | Yes                                                  | No                               | No                        | Yes                        | No                               | No                                    | No                               | No                                           | No                                      | No                                     | No                                    | No                                      | No                                      | No                                       | No                          |
| B1812_06635                                                         | Nitrogenase (vanadium-iron) delta chain                      | Yes                                                  | No                               | No                        | Yes                        | No                               | No                                    | No                               | No                                           | No                                      | No                                     | No                                    | No                                      | No                                      | No                                       | No                          |
| B1812_06605                                                         | Nitrogenase vanadium-cofactor synthesis protein VnfE         | Yes                                                  | No                               | No                        | No                         | No                               | No                                    | No                               | No                                           | No                                      | No                                     | No                                    | No                                      | No                                      | No                                       | No                          |
| B1812_06600                                                         | Nitrogenase vanadium-cofactor synthesis protein VnfN         | Yes                                                  | No                               | No                        | Yes                        | No                               | No                                    | No                               | No                                           | No                                      | No                                     | No                                    | No                                      | No                                      | No                                       | No                          |
| B1812_06595                                                         | Nitrogenase vanadium-cofactor synthesis protein VnfX         | Yes                                                  | No                               | No                        | Yes                        | No                               | No                                    | No                               | No                                           | No                                      | No                                     | No                                    | No                                      | No                                      | No                                       | No                          |

<sup>1</sup>Six of these 15 methanotroph genomes - *Methylocystis bryophila* S285, *Methylocystis sp.* strain SC2, *Methylocella silvestris* BL2, *Methylomonas methanica* MC09, *Methylomicrobium alcaliphilum* 20Z, and *Methylacidiphilum infernorum* V4 - are completely finished and other nine genomes are reported as draft genomes containing a number of contigs or partial genome sequences, which may lead to negative results for certain particular genes in this survey.

<sup>2</sup>*Mec.* = *Methylocystis*, *Ms.* = *Methylosinus*, *Mce.* = *Methylocella*, *Mca.* = *Methylcapsa*, *Mfe.* = *Methyloferula*, *Mc.* = *Methylcococcus*, *Mmo.* = *Methylomonas*, *Mm.* = *Methylomicrobium*, *Ma.* = *Methylacidiphilum*.

<sup>3</sup>Categorization according to the symporter gene tree (Fig. S2). Yes = acetate permease present (sodium:solute symporter sequence clusters coherently within the family *Methylocystaceae*). (Yes) = acetate permease present, but sodium:solute symporter sequence groups on a branch separate from that of the family *Methylocystaceae*. (No) = symporter present but unclear whether it functions as acetate permease.

<sup>4</sup>A gene encoding aldehyde dehydrogenase is not present in the genome of *Methylomicrobium alcaliphilum* 20Z, but a gene coding for aldehyde oxidoreductase was found in its genome. This gene catalyzes the conversion of aldehyde to acid and may reduce the toxicity of aldehyde to bacterial cells.

**Table S5. PCR primers used for detection of *pmoCAB* and their target sites in *pmoA* gene sequence.**

| Primer        | Sequence                                                                                                                                                                                                                                                                                                                                                                                                                                                                                                                                                                                                                                                                                                                                                                                                        |
|---------------|-----------------------------------------------------------------------------------------------------------------------------------------------------------------------------------------------------------------------------------------------------------------------------------------------------------------------------------------------------------------------------------------------------------------------------------------------------------------------------------------------------------------------------------------------------------------------------------------------------------------------------------------------------------------------------------------------------------------------------------------------------------------------------------------------------------------|
| A189f         | 5'-ggngactgggacttctgg-3'                                                                                                                                                                                                                                                                                                                                                                                                                                                                                                                                                                                                                                                                                                                                                                                        |
| A682r         | 5'-gaasgcngagaagaasgc-3' (reverse complement: 5'-gcsttctctcngcsttc-3')                                                                                                                                                                                                                                                                                                                                                                                                                                                                                                                                                                                                                                                                                                                                          |
| Gene          | Sequence                                                                                                                                                                                                                                                                                                                                                                                                                                                                                                                                                                                                                                                                                                                                                                                                        |
| <i>pxmA</i>   | atgactgcgacagacttgaatccgccgttcaaccctatgccccgaaaaagcgcgcctgagccgggacctatgattatctcatcctcgtcctggcgttcttctctcgtcggagc<br>ctttcatctccatgtcgcgctcacggg <b>ggcgactgggattttgg</b> ttggattggaaagaccgccaatggtggccactcatcacaccgctgatgatcaccttcctgcagcgg<br>tcaagcgggtgctctggccaaactccgcttggcgttggcgcgacgctctgcatctcttcttggatcggaaacctggatcacgcgggtcttcgctaccatctgtgaattactc<br>cccataaacgaggttctcccgaacgatgttggcagcgccttgggtgctcagcagtcctcatgctgagcaacagctgaccatcaccagcatttccggcggcatggccttcg<br>ccttgccttctatccgagcaactggcccattttgcatgtttcacgttccggctgagtagcggcggcgcagctgacggcggcggatctcttcggcttccaatacgtgagagccg<br>ggacgccggagtatctcgttggatcagagggggcacgttacgcacttacggccaatacgaacgcctctgtcggcctttg <b>cggtcttctctgcacgc</b> ctgatgtaccgctg<br>tgggtggtgcttggcaaaagcttccaccacgaaatacgtcaaaaatatctaa                      |
| <i>pmoA2</i>  | atgtctgtatcggctgcgcctatcggcaaggcatggaagtcaaaggaggagttctcgggtgcgtcattttgacggactggatcctcctctcgtcctgttcttctgctgctcggct<br>cctaccacatccactatagctgctggcc <b>ggcgactgggacttctgg</b> atcacttcaaagatcggcgcctggtggccgaccgtggcggcggatcgtcggcatgtgcttcgcggcgg<br>ccgcgagctccttctttggactaagttccggctgcccttcggcgcgacggctgacgctggccttctcgtcggcgagtgatgaaccgctacgacaatttctggggttgacc<br>ttctcccgatcagcctggtgttcccctcgcgctgatcccgatggccttctggctcagctcgtgctgctgatctctggcagctggctcgtcaccgcgctgctcggctcgtcggtt<br>ggggcctgttcttctatccgccaactggcctgtgctcgcgcagttaccatcaggccgccgagatcagcggcgtgctgctgaccctcggcgtatctgactggttcaactacgtgcg<br>caccggcacgccggaatacatccgatgatcagcgcggcacgctgcgcaccttcggcaaggatgctgttctcgtcgc <b>gccttctctcgtccttc</b> atctcgtatgctgttactt<br>cctctggtggaagatcgggatgtggttgcggcaccgactatgtgaaggcggagacatctga |
| <i>pmoA1a</i> | atgtcgacatcgaagagcgggggagcggctcggctccattccgtcgcggaaagcggcgggatgcgttcagaccaccgattggatgcttctgacgctgctgtttttgcggttt<br>ggcggtaccacgtccattttatgctgacggc <b>ggcgactgggacttctgg</b> gttactggaaggatcgtcgtatgtggccgacgggtgtccgattctgggcgtgaccttcgcg<br>gcggtcgcagcccttttctgggtgaacttccgtctgccgtttggcgcgggtgttcgcgggttctggcctgctgacggcgagtgatcaaccgctacgtgaacttctggggtg<br>gacctattcccgatcctgctggttcccgtcggctctgatggtccggcgtatgcttggactgacgtatccttctcctcggcgagctatgtgatacggcggatcggcgcgct<br>gggctggggcctgctgttctatccgaacaactggccggcgtcagttccaccaggcagcggagcagcatggtcagctgatgctcgttgcggatctgatcggcttccactt<br>cgtccgcacgtcgtgccaatacatccgatggtcagcgcggcacgctgcgcaccttcggtaaggacgttgcgggttgc <b>gcgttctctcggccttc</b> gtgctgatgctg<br>gtctacttcgctggtggtggtggcggcgttctattcagcaggaaggtcatcaaggaaatctaa                     |

*pmoA1b* atgtcgacatcgaagagcgggggagcggtcgggtccgtccattccgtcgcggaagcggcgggatgcggtcagaccaccgattggatgcttctgacgctgctgtttttgcggttt  
ggcggctaccacgtccatttatgctgacggcgggcactgggacttctgggtgactggaaggatcgtcgatgtggccgacgggtgtgccgattctgggcgtgacctcgcg  
gcggcgtcgcaggccttttctgggtgaactccgtctgccgtttggcgcgggtgttcgcggttctgggcctgctgacggcgagtggatcaaccgctacgtgaactctggggtg  
gacctattcccgatctcgctgggttcccgtcggctctgatggtccggcgcgatcggcttgacgtgaccccttctgctctgggcagctatgtgatcacggcgggtgatggcgcgct  
gggctggggcctgctgttctatccgaacaactggccggcgcgatcggtcagttccaccaggcgcggagcagcatggtcagctgatgctcgttgcggatctgatcggctccact  
cgtccgcacgtcgatgccggaatacatccgcgatggtcgagcgcggcacgctgcgcaccttcgtaaggacgttgccgggtgcggttctctcgggcttcgtgctgatgctg  
gtctacttcgctggtggtggctgggcccgttctattcgacgacgaaggtcatcaaggaaatctaa

---

“s” represents nucleotide “g” or “c”, and “n” represents any nucleotides in primer sequences.

The nucleotides in red indicate mismatch positions between primer and target sequences.

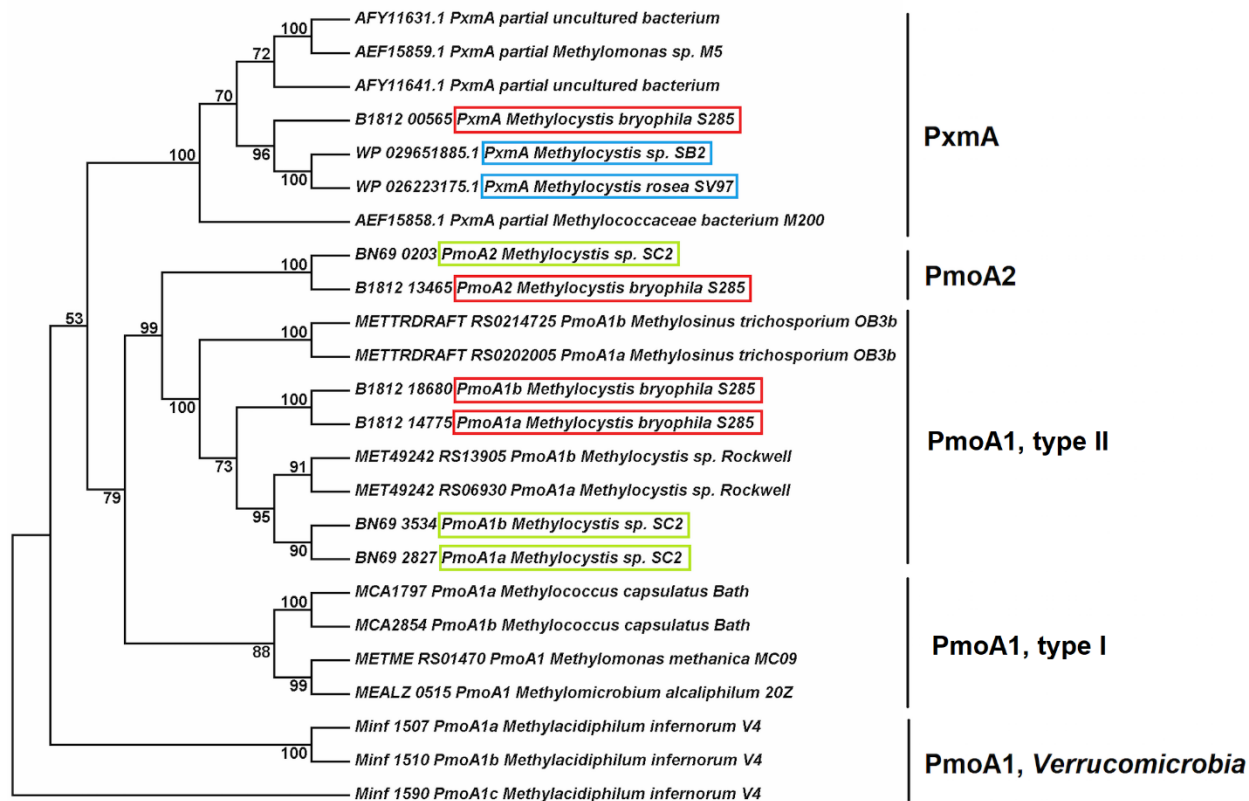

**Figure S1.** Relationship between the deduced amino acid sequences of *pmoA1*, *pmoA2*, and *pxmA* of type I and type II MOB. Branches defined by *Methylocystis bryophila* S285 and *Methylocystis* sp. SC2 are framed in red and green, respectively. PxmA detected in *Methylocystis rosea* SV97 (isolated from subarctic peatland) and *Methylocystis* sp. strain SB2 (isolated from spring bog) are framed in blue. The tree was constructed using MEGA7 with UPGMA as hierarchical cluster method. The percentage of replicate trees in which the associated taxa clustered together in the bootstrap test (1,000 replicates) is shown next to the branch points. The scale indicates genetic distance between amino acid sequences.



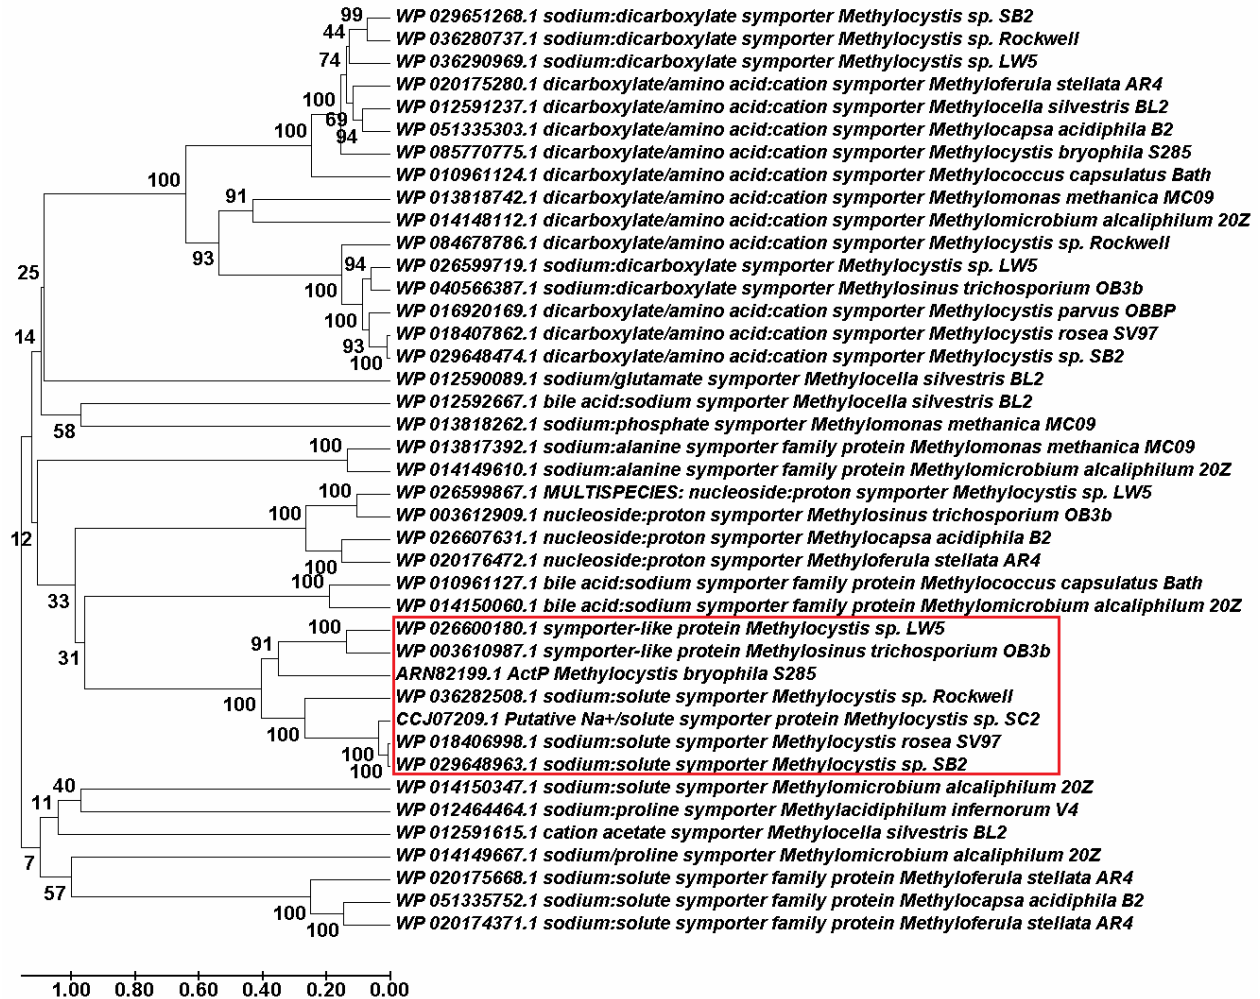

**Figure S2.** Relationship between symporter genes detected in the 15 methanotroph genomes listed in Table S4. Their annotation is according to the respective GenBank database entry. The tree is based on deduced amino acid sequences (310 to 609 residues). The coherent cluster of sodium:solute symporters within the family *Methylocystaceae* is framed in red. Most likely, they function as acetate permease (ActP). The tree was constructed using MEGA7 with UPGMA as hierarchical cluster method. The percentage of replicate trees in which the associated taxa clustered together in the bootstrap test (1,000 replicates) is shown next to the branch points. The scale indicates genetic distance between amino acid sequences.
